# Supplementary material for: Researcher identities and practices inside centres of excellence
Source: Springer Nature journal article supplement (doi:10.1186/s40604-018-0059-3), 2018-12-01
Supplement: MOESM1 [file 16356946]

## Multilingual abstracts

### Arabic

Siri Brorstad Borlaug, Magnus Gulbrandsen

هويات الباحث والممارسات داخل مراكز الامتياز

تهدف العديد من آليات الدعم العلمي إلى الجمع بين تميز البحث والانتظارات العملية حول تأثيرات نتائجه على المستوى الاجتماعي . انتشرت مراكز البحوث ذات الصفة المؤقتة مثل "مراكز الامتياز" و "مراكز الامتياز في البحث و الابتكار". نتوقع أن تنجز هذه المراكز البحوث التي من شأنها أن تساهم في المستقبل في تطوير الاقتصاد ورفع تحديات المجتمعات , ولكننا لا نعرف شيئاً عن الباحثين الذين يعملون في هذه المراكز. نتساءل في هذه الورقة, كيف وإلى أي مدى تؤثر هذه المراكز على الهوية الذاتية للباحث وعلى الممارسات العلمية. استناداً إلى المحادثات التي أجريناها مع 33 باحثاً ينتمون إلى ثمانية مراكز في السويد والنرويج حول المنطق المؤسسي كإطار للتحليل يمكن تصنيف الهويات إلى أربعة أقسام كبرى وذلك حسب الممارسات المعتمدة. يعتمد مستوى التشنج في العلاقات بين الأفراد على مدى تطابق ومركزية منطق الامتياز والابتكار المعتمد في المركز. يبدو أن الالتزام بالابتكار لا يمثل إشكالية في مراكز البحوث العلمية التي تتميز بمستوى منخفض لمركزية منطق الابتكار, في حين أن الأفراد في المراكز المخصصة في نفس الوقت إلى العلم والإبداع في المجالات الجديدة للبحث يتميزون بروابط اجتماعية ضعيفة مع شركائهم. يسود التوتر وعدم الرضا هذه العلاقات في غالب الأحيان.
